# Supplementary material for: MOF-derived Co@C nanoparticle anchored aramid nanofiber (ANF) aerogel for superior microwave absorption capacity
Source: Royal Society of Chemistry journal article supplement (doi:10.1039/d1ra04725f), 2021-01-01
Supplement: d1ra04725f1.pdf [file d1ra04725f1.pdf]

## **Supporting Information**

### **MOF-Derived Co@C nanoparticles anchored Aramid Nanofiber (ANF) Aerogel for Super Microwave Absorption Capacity**

Xin Hao\*

*International College, Zhengzhou University, Zhengzhou, Henan Province, 450000,  
P.R. China.*

*\* Corresponding Author:*

Xin Hao

E-mail address: haoxinzzu@163.com (X. Hao)

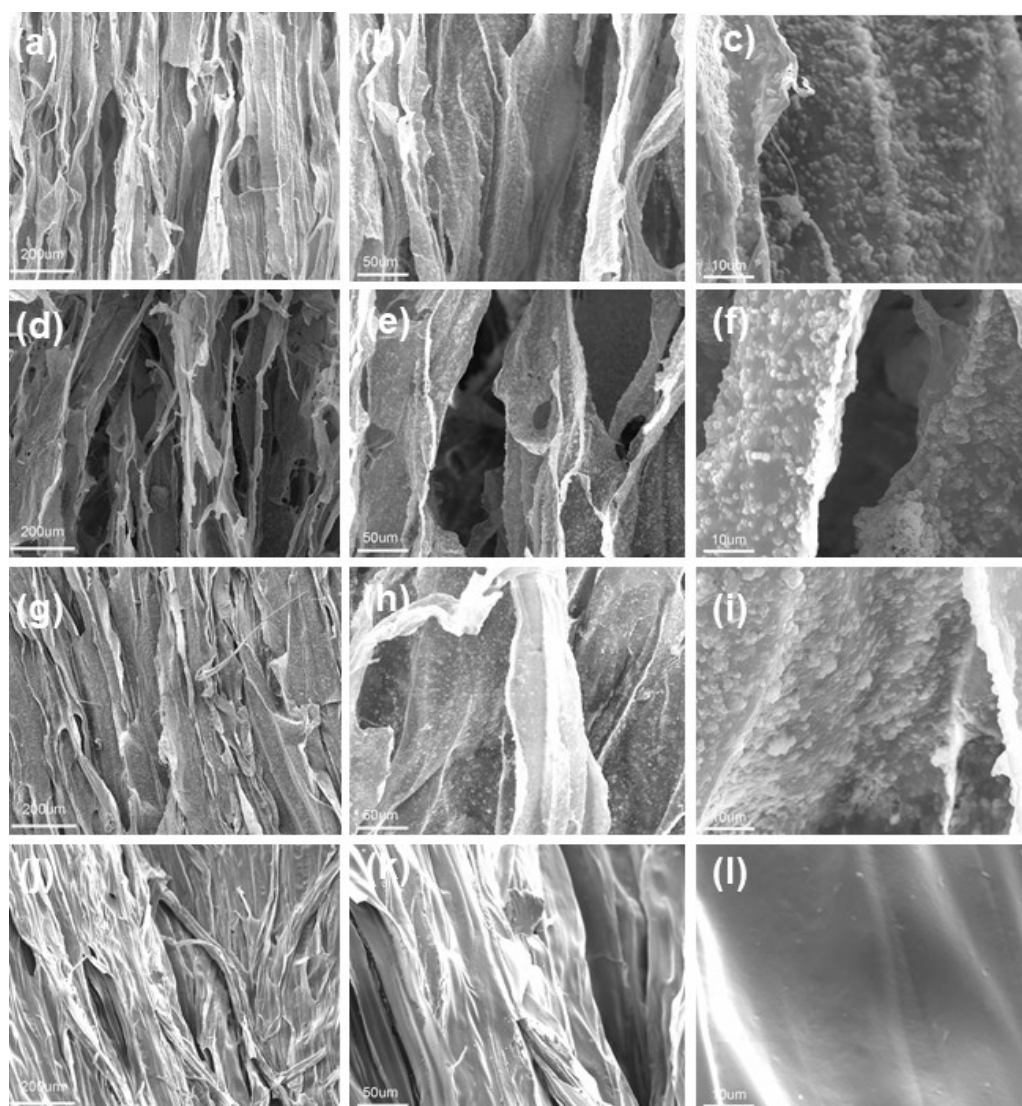

**Figure S1.** SEM images of ZIF-67/ANF aerogel with different ANF to ZIF-67 weight ratios of (a-c) 1:1, (d-f) 1:2, (g-i) 2:1 and (j-l) 1:0.

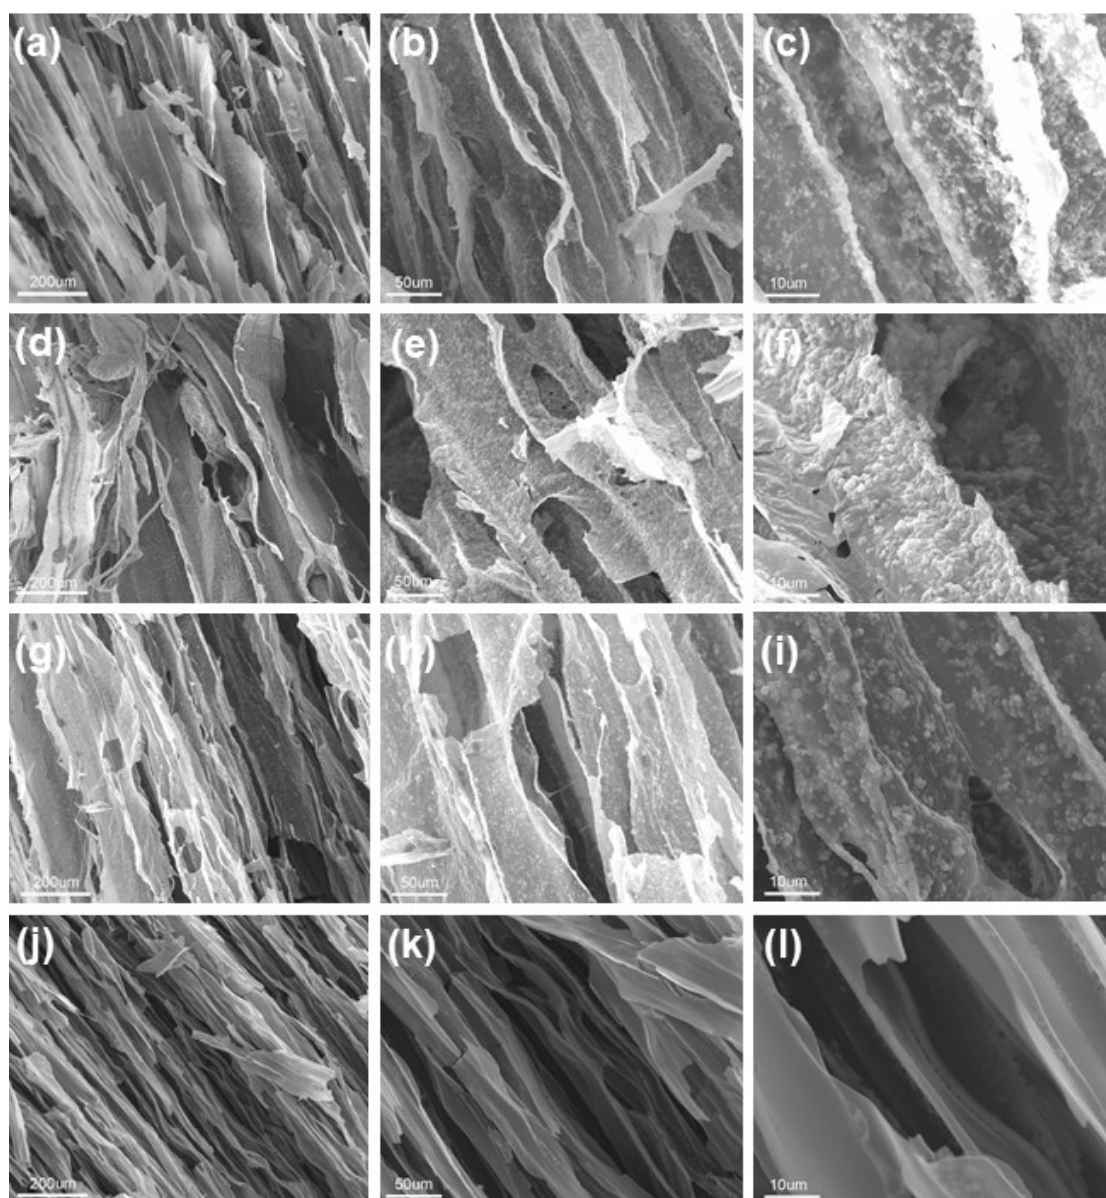

**Figure S2** SEM images of Co@C/ANF aerogel with different ANF to ZIF-67 weight ratios of (a-c) 1:1, (d-f) 1:2, (g-i) 2:1 and (j-l) 1:0.

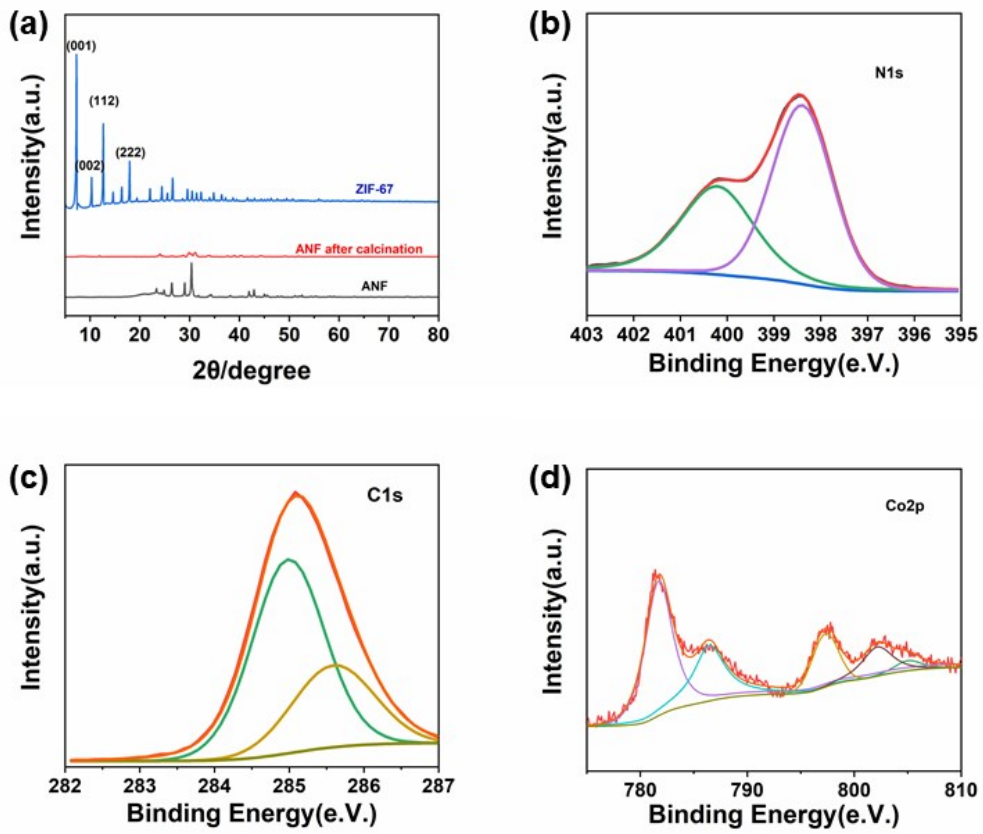

**Figure S3** (a) XRD images of ZIF-67, ANF after calcination, and ANF. XPS spectra of Co@C/ANF (b) C 1s, (c) N 1s and (d) Co 2p.

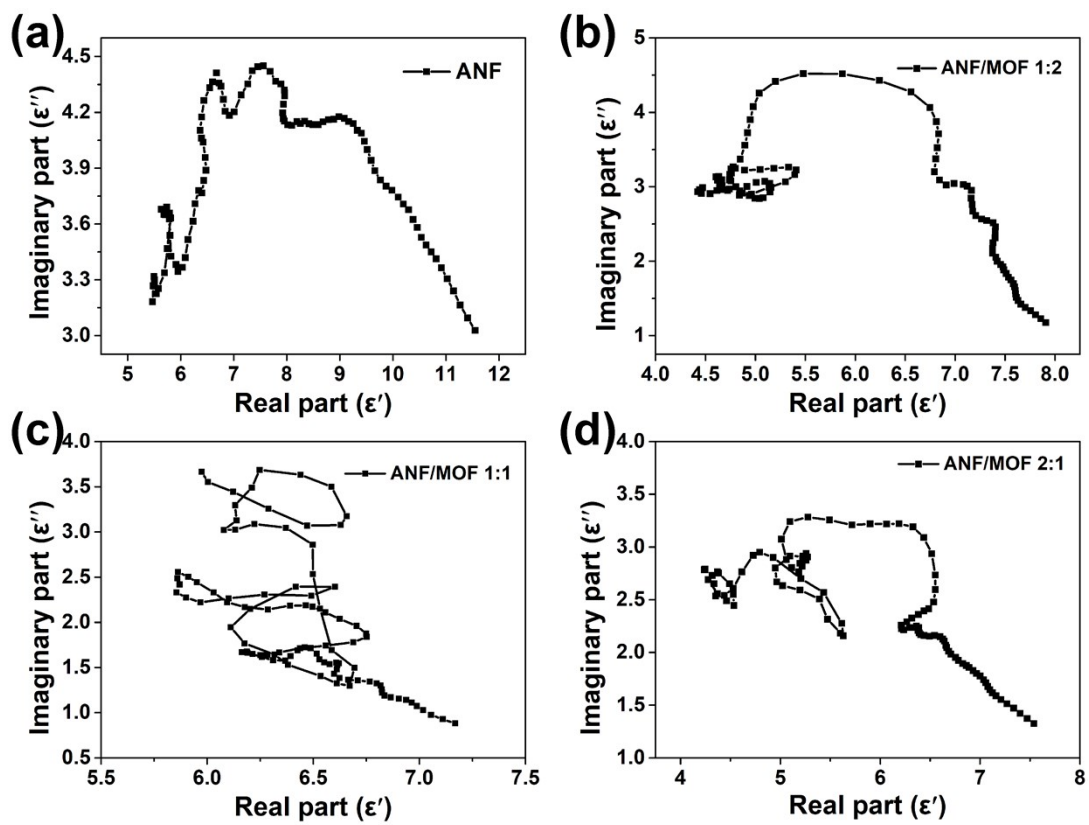

**Figure S4** The Cole-Cole curves of (a) ANF, (b) Co@C/ANF 1:2, (c) Co@C/ANF 1:1 and (d) Co@C/ANF 2:1

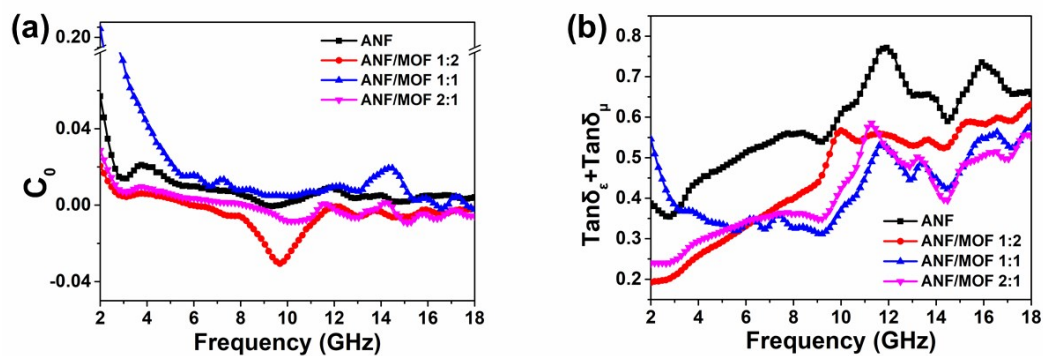

**Figure S5.** (a) Frequency dependence of  $C_0$  for ANF, Co@C/ANF 1:2, Co@C/ANF 1:1, and Co@C/ANF 2:1. (b) Frequency dependence of  $\text{tan}\delta_\mu + \text{tan}\delta_\epsilon$  for ANF, Co@C/ANF 1:2, Co@C/ANF 1:1 and Co@C/ANF 2:1.

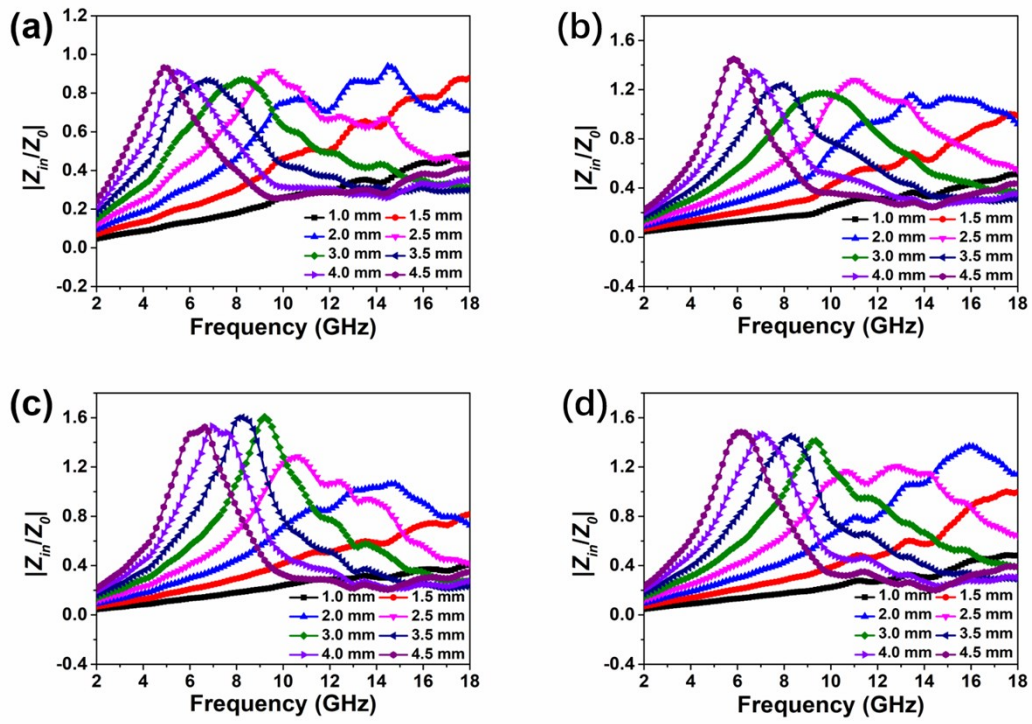

**Figure S6.** Impedance match of samples with different thicknesses (a) ANF (b) Co@C/ANF 1:2 (c) Co@C/ANF 1:1 and (d) Co@C/ANF 2:1
